# Supplementary material for: Pan-cancer analysis of TASL: a novel immune infiltration-related biomarker for tumor prognosis and immunotherapy response prediction
Source: BMC Cancer. 2023 Jun 9;23:528. doi: 10.1186/s12885-023-11015-w (PMC10251564; doi:10.1186/s12885-023-11015-w)
Supplement: Supplementary file 2 — Additional file 2: Supplementary Table 1. The NES values of KEGG pathways that significantly upregulated or downregulated in highly versus lowly TASL groups in more than five cancer types (|NES| ≥ 1.0, P<0.05, FDR<0.25). Supplementary Table 2. Correlation of TASL expression with immune infiltration signatures in 20 cancer types. Supplementary Table 3. ROC curves analysis of TASL, PDL1, PD1, CTLA4 expression, TMB, MSI, and glycolytic activity with immune score and TIL in 20 cancer types. Supplementary Table 4. Correlations of TASL expression with Immune checkpoints, TMB and MSI in 20 cancer types.Supplementary Table 5. Abbreviations, full names and sample sizes for 33 cancer types from the TCGA and GTEx databases. Supplementary Table 6. The original data (E_ normalized values) of TASL expression from GEO datasets used in Figure 6D. Supplementary Table 7. List of datasets from GEO, CGGA, and the article of Miao D, et al. involved in this study. Supplementary Table 8. List of gene sets. [file 12885_2023_11015_MOESM2_ESM.xlsx]

## Sheet: Table S1 
Supplementary Table 1: The NES values of KEGG pathways that significantly upregulated or downregulated in highly versus lowly TASL groups in more than five cancer types (|NES| ≥ 1.0, P<0.05，FDR < 0.25).		immune-related pathways	metabolism-related pathways	cancer-related pathways	# not significant
Pathway	Number of cancer types in which the pathway is upregulated in highly TASL tumors	ACC	BRCA	CESC	ESCA	GBM	HNSC	KIRC	KIRP	LAML	LGG	LUAD	LUSC	OV	PAAD	PRAD	SKCM	STAD	TGCT	THCA	THYM
KEGG_ASTHMA	20	2.07242	2.41228	2.35943	2.02117	2.33091	2.33249	2.61192	2.45623	1.71575	2.26111	1.89167	2.33467	2.43723	2.53145	2.07734	2.16729	2.54314	2.55782	1.91295	1.51046
KEGG_INTESTINAL_IMMUNE_NETWORK_FOR_IGA_PRODUCTION	20	2.23153	2.64564	2.4037	2.02727	2.39575	2.50044	2.84642	2.62073	1.83514	2.34472	1.98004	2.52204	2.69705	2.87588	2.16901	2.41952	2.63913	2.71211	2.11534	2.42128
KEGG_LEISHMANIA_INFECTION	20	2.29473	2.5733	2.52991	1.79916	2.32313	2.36607	2.98996	2.81309	2.23725	2.40559	1.75326	2.51468	2.74981	2.73791	2.16032	2.35328	2.63476	2.76243	2.09319	2.5108
KEGG_ANTIGEN_PROCESSING_AND_PRESENTATION	20	2.07221	2.58533	2.70445	1.83711	2.23403	2.34459	2.51087	2.58054	1.50129	2.18721	1.44547	2.5067	2.79639	2.23229	1.74941	2.35648	2.24927	2.81178	2.07444	1.56654
KEGG_TOLL_LIKE_RECEPTOR_SIGNALING_PATHWAY	20	2.12628	2.38633	2.23092	1.47642	2.31986	2.04012	2.35778	2.53406	1.44695	2.19111	1.43121	2.17917	2.58385	2.17771	1.87509	2.0439	2.46778	2.53929	1.98622	2.11544
KEGG_CELL_ADHESION_MOLECULES_CAMS	20	2.0797	2.39563	2.35299	1.7679	2.14099	2.30054	2.06708	2.67876	-1.4182	2.20089	1.44735	2.57915	2.43984	2.80548	2.04828	2.2542	2.5818	2.34832	2.02933	1.59555
KEGG_NATURAL_KILLER_CELL_MEDIATED_CYTOTOXICITY	20	2.05452	2.56269	2.61173	1.62187	2.16284	2.23579	2.29762	2.48736	1.31417	1.98346	1.43863	2.48335	2.79969	2.41406	1.80689	2.21281	2.29948	2.54877	2.09308	1.80617
KEGG_COMPLEMENT_AND_COAGULATION_CASCADES	20	1.82839	1.81786	1.46109	1.83705	2.09311	2.14291	-1.75576	2.41051	-1.63355	2.21145	-1.38914	2.46822	1.83283	1.46559	1.43467	1.89145	1.86709	1.42921	1.65297	1.66998
KEGG_VIRAL_MYOCARDITIS	20	1.77652	2.48612	2.47709	1.73664	1.77796	2.29198	2.06216	2.48241	1.43669	2.21812	1.74923	2.28933	2.29274	2.31597	1.75901	2.11845	2.25896	2.01141	1.95474	1.69863
KEGG_GRAFT_VERSUS_HOST_DISEASE	19	2.22415	2.62191	2.56657	2.00606	2.40213	2.36879	2.8323	2.67367	#N/A	2.40303	1.84674	2.58003	2.80923	2.86825	2.13246	2.3945	2.61311	2.73098	2.07992	2.58549
KEGG_ALLOGRAFT_REJECTION	19	2.19374	2.56766	2.51559	1.97385	2.34158	2.31276	2.67506	2.57977	#N/A	2.35201	1.89315	2.50987	2.71533	2.67637	2.11774	2.3451	2.55876	2.7333	2.04657	2.42107
KEGG_HEMATOPOIETIC_CELL_LINEAGE	19	2.40609	2.71513	2.50431	2.00471	2.49721	2.43346	2.31084	2.81372	#N/A	2.40949	1.81528	2.61577	2.81757	3.09467	2.14054	2.43751	2.71766	2.67096	2.04352	2.11153
KEGG_TYPE_I_DIABETES_MELLITUS	19	2.15371	2.43613	2.3094	1.87976	2.24865	2.2498	2.57774	2.51107	#N/A	2.14111	1.45249	2.39433	2.593	2.48163	2.05161	2.31031	2.45189	2.5254	2.09653	1.82982
KEGG_PRIMARY_IMMUNODEFICIENCY	19	2.08901	2.56264	2.4647	2.13007	2.13479	2.32397	2.68385	2.35688	#N/A	2.17462	1.80275	2.33423	2.4558	2.80921	2.13218	2.35499	2.44542	2.49362	1.85952	2.27317
KEGG_AUTOIMMUNE_THYROID_DISEASE	19	2.05545	2.41524	2.3802	1.94871	2.19518	2.34701	2.20712	2.27857	#N/A	2.22451	1.78358	2.51002	2.59169	2.38308	2.00731	2.28306	2.32081	2.68982	1.97252	1.57456
KEGG_CHEMOKINE_SIGNALING_PATHWAY	19	2.40067	2.50607	2.5221	1.69259	2.44976	2.32195	2.63829	2.95348	#N/A	2.04688	1.46167	2.52071	2.74399	2.83505	2.00576	2.29559	2.71154	2.33965	2.05893	2.03474
KEGG_CYTOKINE_CYTOKINE_RECEPTOR_INTERACTION	19	2.44023	2.69927	2.55782	1.85478	2.65065	2.46455	2.45007	2.94945	#N/A	2.44522	1.62039	2.72526	2.96753	3.03514	2.16596	2.4313	2.76131	2.502	2.1235	2.08282
KEGG_T_CELL_RECEPTOR_SIGNALING_PATHWAY	19	2.20691	2.38935	2.56752	1.58097	1.99437	2.19915	2.2187	2.47897	#N/A	1.94272	1.55279	2.23403	2.54853	2.66948	1.89142	2.00292	2.37236	2.48253	1.96411	2.08643
KEGG_B_CELL_RECEPTOR_SIGNALING_PATHWAY	19	1.75456	2.16256	2.34736	1.53868	1.94707	1.96355	2.06044	2.35853	#N/A	2.04197	1.4334	2.14927	2.38427	2.56558	1.86852	2.07032	2.2773	2.38812	1.84373	1.74062
KEGG_JAK_STAT_SIGNALING_PATHWAY	19	1.82859	2.35917	2.19879	1.61924	2.06372	2.01868	1.70498	2.20922	#N/A	2.0025	1.41236	2.25459	2.32704	2.41081	1.79115	1.93654	2.20694	2.14981	1.78908	1.99724
KEGG_SYSTEMIC_LUPUS_ERYTHEMATOSUS	18	1.96855	1.82472	2.03482	1.58497	1.9956	1.87936	2.60125	1.9535	#N/A	2.38624	1.76381	2.00076	1.88749	1.55362	1.60876	1.93704	2.08694	2.27804	1.68005	#N/A
KEGG_FC_GAMMA_R_MEDIATED_PHAGOCYTOSIS	18	1.73484	1.96128	2.01699	#N/A	1.88739	1.78583	1.70604	2.08962	1.64584	1.77666	#N/A	1.9173	2.02043	2.00416	1.59869	1.66155	2.00557	2.05868	1.61584	1.52068
KEGG_NOD_LIKE_RECEPTOR_SIGNALING_PATHWAY	17	2.04304	2.14241	2.00913	#N/A	2.43553	1.54781	2.12883	2.55853	#N/A	2.08028	#N/A	1.99747	2.25861	1.93568	1.88866	1.8926	2.1613	2.09122	1.89499	1.51784
KEGG_FC_EPSILON_RI_SIGNALING_PATHWAY	17	1.72182	2.00152	1.85493	#N/A	1.92738	1.70269	1.43311	1.8952	#N/A	1.75934	#N/A	2.08886	1.96107	1.96679	1.66223	1.63571	1.85851	1.97135	1.6158	1.42849
KEGG_NEUROACTIVE_LIGAND_RECEPTOR_INTERACTION	16	1.41622	#N/A	1.43388	1.48469	#N/A	1.71714	-1.58815	1.69773	-1.36807	-1.99704	#N/A	1.66082	#N/A	2.22646	1.70116	1.73892	1.88706	-1.66209	1.30628	1.44362
KEGG_APOPTOSIS	16	1.47391	1.81204	1.7088	#N/A	1.81454	1.47602	1.5897	1.8728	#N/A	1.77174	#N/A	1.84004	2.063	1.82226	#N/A	1.59304	1.98719	1.89496	1.57389	1.54657
KEGG_RIBOSOME	16	#N/A	-2.62679	-2.15099	-2.9005	1.52385	-2.75543	-1.94533	-1.74993	#N/A	#N/A	-2.50369	#N/A	-2.27028	-1.96921	-3.85133	-2.63309	-1.92274	-1.64518	-1.7579	-2.66313
KEGG_CYTOSOLIC_DNA_SENSING_PATHWAY	15	2.11422	1.95557	1.9964	#N/A	1.95493	1.4751	1.90315	1.85743	#N/A	1.84089	#N/A	1.711	1.99418	#N/A	1.72562	1.76005	1.69165	2.25713	1.79837	#N/A
KEGG_LEUKOCYTE_TRANSENDOTHELIAL_MIGRATION	15	1.69396	1.93493	1.73692	#N/A	1.82223	1.83668	#N/A	2.14287	#N/A	1.87522	#N/A	2.24841	1.73391	2.2219	1.6984	1.95226	1.92475	1.58861	1.72568	#N/A
KEGG_FOCAL_ADHESION	15	1.64971	1.60802	1.68045	#N/A	#N/A	1.86094	#N/A	1.92916	-1.72229	1.68845	#N/A	1.97162	1.78101	2.00473	1.64375	1.51436	2.12362	-1.28218	1.42788	#N/A
KEGG_ECM_RECEPTOR_INTERACTION	15	1.56934	1.62969	1.88155	#N/A	1.45791	1.90307	#N/A	1.9591	-1.95805	1.80718	#N/A	2.06324	1.94431	1.98761	1.8901	1.67714	2.20479	#N/A	1.57035	#N/A
KEGG_PRION_DISEASES	15	1.59429	1.60018	2.02117	1.41904	1.63519	1.83089	#N/A	1.9721	#N/A	2.02837	#N/A	1.79136	1.68689	1.53099	1.48397	#N/A	1.9166	#N/A	1.58088	1.45339
KEGG_METABOLISM_OF_XENOBIOTICS_BY_CYTOCHROME_P450	14	1.99216	-1.58494	-1.72396	-2.252	1.49024	-1.81986	-1.7993	#N/A	-1.60371	1.3608	-2.29193	-1.70093	-1.4831	-1.43085	#N/A	#N/A	#N/A	-1.41248	#N/A	#N/A
KEGG_PATHWAYS_IN_CANCER	13	1.40993	1.41363	#N/A	#N/A	#N/A	1.33531	#N/A	1.70504	-1.57715	1.49891	#N/A	1.40993	#N/A	1.5567	1.46747	1.27741	1.45925	-1.29583	1.28347	#N/A
KEGG_CALCIUM_SIGNALING_PATHWAY	13	1.33264	#N/A	#N/A	#N/A	#N/A	1.87682	-1.36807	1.55345	#N/A	-1.92279	#N/A	1.51968	1.35688	1.65991	1.56232	1.40658	1.8651	-1.48626	#N/A	1.43383
KEGG_OXIDATIVE_PHOSPHORYLATION	13	#N/A	-2.37344	-1.77277	#N/A	#N/A	-2.13204	-2.33377	#N/A	#N/A	-1.8529	-2.29358	#N/A	-1.62592	-1.9962	#N/A	-2.32388	-1.40312	-1.35958	-1.92329	-2.40778
KEGG_REGULATION_OF_ACTIN_CYTOSKELETON	12	1.5255	1.31931	#N/A	#N/A	#N/A	1.7742	#N/A	1.84494	-1.38928	1.54872	#N/A	1.59907	1.32761	1.55403	1.47271	1.42566	1.5042	#N/A	#N/A	#N/A
KEGG_LYSOSOME	12	1.45102	#N/A	1.4489	#N/A	1.94635	1.52846	#N/A	2.12571	1.75541	1.45408	#N/A	2.02882	2.16768	1.41729	#N/A	#N/A	1.56172	2.33883	#N/A	#N/A
KEGG_HUNTINGTONS_DISEASE	12	#N/A	-1.96574	-1.72993	#N/A	#N/A	-1.69663	-1.85807	#N/A	#N/A	-1.3683	#N/A	#N/A	-1.52934	-1.94012	#N/A	-1.82362	-1.38059	-1.49464	-1.73746	-1.99512
KEGG_ASCORBATE_AND_ALDARATE_METABOLISM	11	1.83734	-1.62786	#N/A	-1.56545	#N/A	#N/A	#N/A	#N/A	-1.52137	1.41417	-2.24072	-1.6731	-1.65247	-1.49143	1.63739	#N/A	#N/A	-1.62842	#N/A	#N/A
KEGG_PARKINSONS_DISEASE	11	#N/A	-2.05624	-1.4581	#N/A	#N/A	-1.76279	-1.95151	#N/A	#N/A	-1.69524	-2.16275	#N/A	-1.46812	-1.91184	#N/A	-1.89223	#N/A	#N/A	-1.72189	-2.16516
KEGG_DRUG_METABOLISM_CYTOCHROME_P450	10	2.10523	-1.37802	-1.57818	-1.99564	#N/A	-1.49259	-1.76135	#N/A	-1.77713	#N/A	-1.9067	-1.51154	-1.50091	#N/A	#N/A	#N/A	#N/A	#N/A	#N/A	#N/A
KEGG_PENTOSE_AND_GLUCURONATE_INTERCONVERSIONS	10	1.73577	-1.69014	#N/A	-1.58585	#N/A	#N/A	#N/A	#N/A	-1.55638	#N/A	-2.28619	-1.71481	-1.6387	-1.6035	1.51564	#N/A	#N/A	-1.56378	#N/A	#N/A
KEGG_RETINOL_METABOLISM	9	1.91301	#N/A	-1.63974	#N/A	#N/A	#N/A	-1.81384	#N/A	-1.61869	#N/A	-1.99108	-1.44874	-1.59448	#N/A	#N/A	#N/A	#N/A	-1.51676	#N/A	1.47864
KEGG_PPAR_SIGNALING_PATHWAY	9	1.53845	#N/A	#N/A	#N/A	1.6781	1.45407	-1.7248	1.91216	#N/A	#N/A	#N/A	1.74065	#N/A	1.39698	-1.67138	#N/A	1.51212	#N/A	#N/A	#N/A
KEGG_RIG_I_LIKE_RECEPTOR_SIGNALING_PATHWAY	9	1.47291	1.50405	1.42364	#N/A	1.62575	#N/A	#N/A	#N/A	#N/A	#N/A	#N/A	1.47099	1.48298	#N/A	#N/A	1.48629	#N/A	1.8187	1.51734	#N/A
KEGG_MATURITY_ONSET_DIABETES_OF_THE_YOUNG	9	-1.55195	-2.06121	-2.07703	#N/A	#N/A	#N/A	-1.71592	-1.54714	#N/A	#N/A	-2.18439	-1.5505	-1.89858	#N/A	#N/A	#N/A	#N/A	-1.54686	#N/A	#N/A
KEGG_PORPHYRIN_AND_CHLOROPHYLL_METABOLISM	8	1.87656	-1.70533	#N/A	-1.51679	#N/A	#N/A	#N/A	#N/A	-1.51804	1.42777	-2.00301	-1.61732	#N/A	#N/A	1.61835	#N/A	#N/A	#N/A	#N/A	#N/A
KEGG_SPLICEOSOME	8	#N/A	-1.58312	#N/A	#N/A	-1.76684	-1.74869	#N/A	#N/A	#N/A	#N/A	-2.38946	-1.9352	#N/A	#N/A	#N/A	-1.37674	-1.51355	-1.49669	#N/A	#N/A
KEGG_HYPERTROPHIC_CARDIOMYOPATHY_HCM	8	#N/A	#N/A	#N/A	1.39206	#N/A	2.16944	#N/A	#N/A	#N/A	#N/A	#N/A	1.60742	#N/A	#N/A	1.59399	1.66319	1.79657	-1.74757	1.46456	#N/A
KEGG_DILATED_CARDIOMYOPATHY	8	#N/A	#N/A	#N/A	1.30799	#N/A	2.16361	#N/A	1.47878	#N/A	#N/A	#N/A	1.55864	#N/A	#N/A	1.61694	1.61588	1.88505	-1.80459	#N/A	#N/A
KEGG_PANTOTHENATE_AND_COA_BIOSYNTHESIS	7	1.74	#N/A	#N/A	#N/A	1.56792	1.53175	#N/A	1.92832	#N/A	#N/A	#N/A	1.71988	#N/A	#N/A	#N/A	1.58249	#N/A	1.70507	#N/A	#N/A
KEGG_STARCH_AND_SUCROSE_METABOLISM	7	1.64304	-1.71054	-1.40188	#N/A	#N/A	#N/A	#N/A	#N/A	-1.44549	#N/A	-2.01603	#N/A	-1.47284	#N/A	1.45417	#N/A	#N/A	#N/A	#N/A	#N/A
KEGG_CARDIAC_MUSCLE_CONTRACTION	7	#N/A	-1.8393	#N/A	#N/A	#N/A	1.59786	-1.95577	#N/A	#N/A	-1.93099	#N/A	#N/A	-1.82464	-2.019	#N/A	#N/A	#N/A	-1.97337	#N/A	#N/A
KEGG_ALZHEIMERS_DISEASE	7	#N/A	-1.8184	#N/A	#N/A	#N/A	#N/A	-1.66553	#N/A	#N/A	-1.33141	#N/A	#N/A	#N/A	-1.69214	#N/A	-1.77827	#N/A	#N/A	-1.45968	-1.83791
KEGG_GLUTATHIONE_METABOLISM	7	#N/A	-1.65656	#N/A	-2.4323	#N/A	-1.90337	-1.46957	#N/A	#N/A	#N/A	-1.94651	-1.64798	#N/A	#N/A	-1.60809	#N/A	#N/A	#N/A	#N/A	#N/A
KEGG_NITROGEN_METABOLISM	7	#N/A	#N/A	-1.77719	-1.79088	#N/A	#N/A	#N/A	#N/A	#N/A	#N/A	-1.68067	#N/A	#N/A	-1.66709	#N/A	#N/A	-1.57396	-1.5806	-1.68739	#N/A
KEGG_VASCULAR_SMOOTH_MUSCLE_CONTRACTION	7	#N/A	#N/A	1.34648	#N/A	#N/A	1.83032	#N/A	1.50714	#N/A	#N/A	#N/A	1.90374	1.40578	1.67279	#N/A	#N/A	1.70532	#N/A	#N/A	#N/A
KEGG_ACUTE_MYELOID_LEUKEMIA	7	#N/A	#N/A	1.63023	#N/A	#N/A	#N/A	#N/A	1.96114	#N/A	1.42694	#N/A	1.71957	1.68947	1.91466	#N/A	#N/A	1.55427	#N/A	#N/A	#N/A
KEGG_TRYPTOPHAN_METABOLISM	7	#N/A	#N/A	#N/A	1.41052	1.80386	1.46377	#N/A	#N/A	#N/A	#N/A	#N/A	1.61338	#N/A	1.51548	#N/A	1.6609	1.64405	#N/A	#N/A	#N/A
KEGG_RENIN_ANGIOTENSIN_SYSTEM	6	1.71624	#N/A	#N/A	#N/A	#N/A	1.75636	#N/A	#N/A	#N/A	#N/A	#N/A	1.86349	1.6592	2.16137	#N/A	#N/A	1.70076	#N/A	#N/A	#N/A
KEGG_DRUG_METABOLISM_OTHER_ENZYMES	6	1.91026	#N/A	#N/A	-1.5987	#N/A	#N/A	#N/A	#N/A	#N/A	#N/A	-1.87434	#N/A	#N/A	-1.41225	#N/A	#N/A	#N/A	-1.51044	#N/A	1.45905
KEGG_STEROID_HORMONE_BIOSYNTHESIS	6	1.76454	-1.50087	#N/A	#N/A	#N/A	#N/A	-1.69	#N/A	#N/A	#N/A	-2.00917	#N/A	-1.50991	#N/A	1.46626	#N/A	#N/A	#N/A	#N/A	#N/A
KEGG_RNA_POLYMERASE	6	#N/A	-1.65913	#N/A	-1.88421	#N/A	-1.63984	#N/A	#N/A	#N/A	#N/A	-1.9627	#N/A	#N/A	#N/A	-2.04793	-1.86533	#N/A	#N/A	#N/A	#N/A
KEGG_MELANOMA	6	#N/A	#N/A	-1.51132	#N/A	#N/A	1.51708	#N/A	#N/A	-1.52055	#N/A	#N/A	1.43486	#N/A	#N/A	1.39967	#N/A	#N/A	-1.66217	#N/A	#N/A
KEGG_OLFACTORY_TRANSDUCTION	6	#N/A	#N/A	#N/A	1.63204	#N/A	#N/A	#N/A	-1.4449	-1.44938	#N/A	#N/A	-1.37545	#N/A	#N/A	#N/A	#N/A	-1.7206	#N/A	#N/A	-1.6068
KEGG_HOMOLOGOUS_RECOMBINATION	6	#N/A	#N/A	#N/A	-1.99782	-1.52554	#N/A	#N/A	#N/A	1.49384	#N/A	-1.62158	-1.77449	#N/A	#N/A	#N/A	#N/A	#N/A	#N/A	#N/A	1.46517
KEGG_DNA_REPLICATION	6	#N/A	#N/A	#N/A	-2.05413	-1.43382	#N/A	#N/A	#N/A	1.68452	#N/A	-1.98492	-1.67848	#N/A	#N/A	#N/A	#N/A	-1.4474	#N/A	#N/A	#N/A
KEGG_ARGININE_AND_PROLINE_METABOLISM	6	#N/A	#N/A	#N/A	-1.74909	#N/A	#N/A	-1.6976	#N/A	#N/A	#N/A	-1.99274	#N/A	#N/A	-1.59466	-1.52758	#N/A	#N/A	-1.63965	#N/A	#N/A
KEGG_HEDGEHOG_SIGNALING_PATHWAY	6	#N/A	#N/A	#N/A	-1.49496	-1.54018	#N/A	#N/A	#N/A	-1.64042	#N/A	#N/A	#N/A	-1.53867	#N/A	1.4704	#N/A	#N/A	-1.92445	#N/A	#N/A
KEGG_MAPK_SIGNALING_PATHWAY	6	#N/A	#N/A	#N/A	#N/A	#N/A	1.50696	#N/A	1.391	#N/A	#N/A	#N/A	1.48671	#N/A	#N/A	1.40122	1.36378	1.45518	#N/A	#N/A	#N/A
KEGG_TGF_BETA_SIGNALING_PATHWAY	6	#N/A	#N/A	#N/A	#N/A	#N/A	#N/A	#N/A	#N/A	-1.53363	1.53137	#N/A	#N/A	#N/A	1.80195	1.6287	1.45647	#N/A	-1.36673	#N/A	#N/A
KEGG_ENDOCYTOSIS	5	1.37602	#N/A	#N/A	#N/A	#N/A	#N/A	#N/A	1.82199	#N/A	#N/A	#N/A	1.51018	1.75655	1.30372	#N/A	#N/A	#N/A	#N/A	#N/A	#N/A
KEGG_ADIPOCYTOKINE_SIGNALING_PATHWAY	5	#N/A	1.65617	#N/A	#N/A	1.46034	#N/A	#N/A	1.73057	#N/A	#N/A	#N/A	#N/A	#N/A	1.9738	#N/A	#N/A	1.43292	#N/A	#N/A	#N/A
KEGG_ABC_TRANSPORTERS	5	#N/A	1.55711	#N/A	#N/A	#N/A	#N/A	#N/A	#N/A	-1.63644	#N/A	#N/A	#N/A	#N/A	1.48264	1.55762	#N/A	1.63605	#N/A	#N/A	#N/A
KEGG_NEUROTROPHIN_SIGNALING_PATHWAY	5	#N/A	#N/A	1.46594	#N/A	#N/A	#N/A	#N/A	1.55447	#N/A	#N/A	#N/A	#N/A	1.4785	1.3234	#N/A	#N/A	1.37316	#N/A	#N/A	#N/A
KEGG_MISMATCH_REPAIR	5	#N/A	#N/A	#N/A	-1.93536	#N/A	#N/A	#N/A	#N/A	1.73438	#N/A	-1.6803	-1.51526	#N/A	#N/A	#N/A	#N/A	#N/A	#N/A	#N/A	1.55915
KEGG_STEROID_BIOSYNTHESIS	5	#N/A	#N/A	#N/A	-1.84938	#N/A	-1.57414	#N/A	#N/A	#N/A	#N/A	#N/A	#N/A	#N/A	#N/A	-1.49966	-1.60866	-1.58484	#N/A	#N/A	#N/A
KEGG_AMINOACYL_TRNA_BIOSYNTHESIS	5	#N/A	#N/A	#N/A	-2.282	-1.68719	#N/A	#N/A	#N/A	#N/A	#N/A	-2.00173	#N/A	#N/A	#N/A	-2.09194	-1.44824	#N/A	#N/A	#N/A	#N/A
KEGG_BASAL_CELL_CARCINOMA	5	#N/A	#N/A	#N/A	-1.94364	-1.72782	#N/A	#N/A	#N/A	-1.70927	#N/A	#N/A	#N/A	-1.52847	#N/A	#N/A	#N/A	#N/A	-1.90137	#N/A	#N/A
KEGG_CELL_CYCLE	5	#N/A	#N/A	#N/A	#N/A	-2.02788	#N/A	#N/A	#N/A	#N/A	#N/A	-2.2341	-1.50922	#N/A	#N/A	#N/A	#N/A	-1.38317	#N/A	#N/A	1.91609
KEGG_AXON_GUIDANCE	5	#N/A	#N/A	#N/A	#N/A	-1.31598	#N/A	-1.37901	#N/A	-1.35641	-1.49258	#N/A	#N/A	#N/A	#N/A	#N/A	#N/A	#N/A	-1.69218	#N/A	#N/A
KEGG_VEGF_SIGNALING_PATHWAY	5	#N/A	#N/A	#N/A	#N/A	1.43342	#N/A	#N/A	#N/A	#N/A	#N/A	#N/A	1.60497	1.3756	1.42274	#N/A	#N/A	#N/A	1.36548	#N/A	#N/A
KEGG_ARRHYTHMOGENIC_RIGHT_VENTRICULAR_CARDIOMYOPATHY_ARVC	5	#N/A	#N/A	#N/A	#N/A	#N/A	2.02694	#N/A	#N/A	#N/A	#N/A	#N/A	1.4906	#N/A	#N/A	1.62716	#N/A	1.43261	-1.59682	#N/A	#N/A

## Sheet: Table S2 
Supplementary Table 2: Correlation of TASL expression with immune infiltration signatures in 20 cancer types.
CYT: immune cytolytic activity，CCR:Cytokine and Cytokine Receptor，HLA: human leukocyte antigen，TIL: tumor-infiltrating lymphocyte，IFN: interferon response.
	R value
Cancer Type	CYT	HLA	TIL	IFN	CCR
ACC	0.608364	0.63541	0.759317	0.644831	0.71085
BRCA	0.635735	0.675801	0.762956	0.717613	0.697469
CESC	0.50237	0.559643	0.809059	0.668495	0.70818
ESCA	0.572915	0.712745	0.85107	0.653201	0.675607
GBM	0.632139	0.661768	0.784917	0.508332	0.701085
HNSC	0.587159	0.688932	0.864625	0.632964	0.718601
KIRC	0.423558	0.561929	0.667018	0.663527	0.579576
KIRP	0.533385	0.639829	0.722797	0.596743	0.708946
LAML	-0.157194	0.443998	0.141562	0.223458	0.224744
LGG	0.345762	0.591774	0.682624	0.59444	0.677583
LUAD	0.398009	0.52153	0.673441	0.526456	0.59653
LUSC	0.671071	0.798966	0.90487	0.714068	0.791594
OV	0.614777	0.599737	0.812122	0.638106	0.724881
PAAD	0.716368	0.658081	0.885213	0.661132	0.854015
PRAD	0.590717	0.630834	0.789199	0.768101	0.774986
SKCM	0.715343	0.714465	0.830351	0.810858	0.764381
STAD	0.593245	0.658233	0.857705	0.608622	0.72491
TGCT	0.685202	0.819763	0.837306	0.879733	0.758385
THCA	0.685867	0.794655	0.858734	0.77461	0.839718
THYM	0.153945	0.203048	0.543284	0.324712	0.258681

## Sheet: Table S3 
Supplementary Table 3: ROC curves analysis of TASL, PDL1, PD1, CTLA4 expression, TMB, MSI, and glycolytic activity with immune score and TIL in 20 cancer types.
TIL: tumor-infiltrating lymphocyte; TMB: tumor mutation burden
Immune score
TASL				PDL1				PD1				CTLA4				TMB				MSI				Glycolysis				PDL2
Cancer type	AUC-value	95% CI		Cancer type	AUC-value	95% CI		Cancer type	AUC-value	95% CI		Cancer type	AUC-value	95% CI		Cancer type	AUC-value	95% CI		Cancer type	AUC-value	95% CI		Cancer type	AUC-value	95% CI		Cancer type	AUC-value	95% CI
ACC	0.883	0.804-0.962		ACC	0.749	0.640-0.857		ACC	0.833	0.741-0.926		ACC	0.869	0.788-0.949		ACC	0.749	0.642-0.857		ACC	0.615	0.490-0.740		ACC	0.64	0.517-0.762		ACC	0.853	0.768-0.938
BRCA	0.886	0.868-0.905		BRCA	0.807	0.781-0.833		BRCA	0.901	0.884-0.919		BRCA	0.887	0.869-0.906		BRCA	0.507	0.473-0.541		BRCA	0.509	0.474-0.543		BRCA	0.603	0.569-0.637		BRCA	0.876	0.856-0.897
CESC	0.893	0.858-0.928		CESC	0.811	0.763-0.858		CESC	0.897	0.861-0.932		CESC	0.949	0.926-0.972		CESC	0.504	0.439-0.569		CESC	0.555	0.491-0.620		CESC	0.468	0.403-0.533		CESC	0.865	0.824-0.906
ESCA	0.932	0.896-0.967		ESCA	0.733	0.656-0.811		ESCA	0.898	0.852-0.945		ESCA	0.872	0.816-0.928		ESCA	0.499	0.410-0.589		ESCA	0.62	0.534-0.707		ESCA	0.538	0.449-0.628		ESCA	0.809	0.744-0.874
GBM	0.909	0.865-0.953		GBM	0.641	0.557-0.724		GBM	0.735	0.660-0.811		GBM	0.828	0.767-0.889		GBM	0.527	0.438-0.615		GBM	0.515	0.427-0.603		GBM	0.739	0.665-0.814		GBM	0.794	0.728-0.860
HNSC	0.908	0.883-0.934		HNSC	0.784	0.745-0.824		HNSC	0.918	0.895-0.941		HNSC	0.922	0.898-0.945		HNSC	0.581	0.531-0.631		HNSC	0.573	0.523-0.623		HNSC	0.508	0.457-0.559		HNSC	0.807	0.769-0.844
KIRC	0.838	0.804-0.872		KIRC	0.639	0.592-0.685		KIRC	0.874	0.845-0.903		KIRC	0.845	0.812-0.877		KIRC	0.531	0.483-0.578		KIRC	0.542	0.494-0.589		KIRC	0.542	0.493-0.590		KIRC	0.822	0.787-0.857
KIRP	0.846	0.802-0.890		KIRP	0.618	0.552-0.683		KIRP	0.778	0.725-0.830		KIRP	0.795	0.745-0.846		KIRP	0.543	0.477-0.610		KIRP	0.567	0.501-0.633		KIRP	0.546	0.479-0.612		KIRP	0.825	0.777-0.872
LAML	0.755	0.676-0.834		LAML	0.676	0.589-0.762		LAML	0.521	0.428-0.614		LAML	0.748	0.671-0.826		LAML	0.45	0.367-0.532		LAML	0.469	0.384-0.554		LAML	0.722	0.640-0.805		LAML	0.733	0.652-0.813
LGG	0.912	0.888-0.936		LGG	0.798	0.760-0.836		LGG	0.766	0.726-0.807		LGG	0.73	0.688-0.772		LGG	0.472	0.423-0.522		LGG	0.542	0.493-0.591		LGG	0.617	0.570-0.665		LGG	0.892	0.864-0.919
LUAD	0.85	0.817-0.883		LUAD	0.811	0.774-0.848		LUAD	0.85	0.817-0.882		LUAD	0.86	0.828-0.891		LUAD	0.58	0.531-0.628		LUAD	0.556	0.507-0.606		LUAD	0.533	0.484-0.583		LUAD	0.894	0.867-0.921
LUSC	0.954	0.938-0.970		LUSC	0.675	0.628-0.722		LUSC	0.9	0.873-0.927		LUSC	0.909	0.883-0.935		LUSC	0.564	0.514-0.614		LUSC	0.645	0.597-0.693		LUSC	0.482	0.431-0.533		LUSC	0.832	0.796-0.867
OV	0.9	0.870-0.930		OV	0.789	0.745-0.834		OV	0.81	0.767-0.853		OV	0.892	0.861-0.923		OV	0.537	0.479-0.594		OV	0.564	0.507-0.621		OV	0.569	0.511-0.626		OV	0.907	0.878-0.936
PAAD	0.937	0.904-0.970		PAAD	0.749	0.676-0.822		PAAD	0.861	0.808-0.914		PAAD	0.901	0.858-0.945		PAAD	0.549	0.461-0.637		PAAD	0.558	0.472-0.643		PAAD	0.627	0.545-0.709		PAAD	0.859	0.806-0.912
PRAD	0.885	0.857-0.913		PRAD	0.807	0.770-0.845		PRAD	0.889	0.861-0.916		PRAD	0.878	0.849-0.908		PRAD	0.519	0.468-0.570		PRAD	0.491	0.441-0.542		PRAD	0.555	0.504-0.605		PRAD	0.86	0.829-0.891
SKCM	0.906	0.879-0.934		SKCM	0.858	0.824-0.892		SKCM	0.943	0.924-0.963		SKCM	0.793	0.751-0.835		SKCM	0.514	0.461-0.566		SKCM	0.576	0.524-0.627		SKCM	0.541	0.489-0.593		SKCM	0.905	0.878-0.932
STAD	0.937	0.914-0.960		STAD	0.794	0.749-0.839		STAD	0.852	0.815-0.890		STAD	0.824	0.782-0.867		STAD	0.593	0.534-0.651		STAD	0.632	0.575-0.689		STAD	0.561	0.502-0.619		STAD	0.916	0.889-0.942
TGCT	0.926	0.886-0.966		TGCT	0.935	0.901-0.970		TGCT	0.953	0.923-0.982		TGCT	0.952	0.922-0.981		TGCT	0.532	0.440-0.664		TGCT	0.712	0.631-0.793		TGCT	0.566	0.473-0.658		TGCT	0.958	0.932-0.984
THCA	0.92	0.897-0.942		THCA	0.796	0.757-0.835		THCA	0.836	0.802-0.870		THCA	0.958	0.943-0.974		THCA	0.464	0.414-0.514		THCA	0.541	0.490-0.591		THCA	0.547	0.496-0.597		THCA	0.896	0.870-0.923
THYM	0.706	0.614-0.799		THYM	0.604	0.499-0.708		THYM	0.784	0.701-0.867		THYM	0.71	0.618-0.803		THYM	0.688	0.589-0.787		THYM	0.587	0.484-0.690		THYM	0.531	0.427-0.636		THYM	0.736	0.646-0.826
TIL
TASL				PDL1				PD1				CTLA4				TMB				MSI				Glycolysis				PDL2
Cancer type	AUC-value	95% CI		Cancer type	AUC-value	95% CI		Cancer type	AUC-value	95% CI		Cancer type	AUC-value	95% CI		Cancer type	AUC-value	95% CI		Cancer type	AUC-value	95% CI		Cancer type	AUC-value	95% CI		Cancer type	AUC-value	95% CI
ACC	0.846	0.755-0.936		ACC	0.781	0.677-0.885		ACC	0.856	0.775-0.938		ACC	0.927	0.871-0.983		ACC	0.758	0.650-0.865		ACC	0.543	0.413-0.673		ACC	0.695	0.578-0.811		ACC	0.91	0.845-0.976
BRCA	0.886	0.868-0.905		BRCA	0.807	0.781-0.833		BRCA	0.901	0.884-0.919		BRCA	0.887	0.869-0.906		BRCA	0.507	0.473-0.541		BRCA	0.509	0.474-0.543		BRCA	0.603	0.569-0.637		BRCA	0.876	0.856-0.897
CESC	0.898	0.862-0.933		CESC	0.806	0.758-0.855		CESC	0.921	0.890-0.953		CESC	0.95	0.927-0.973		CESC	0.487	0.422-0.552		CESC	0.547	0.482-0.612		CESC	0.54	0.476-0.605		CESC	0.86	0.817-0.903
ESCA	0.937	0.901-0.972		ESCA	0.733	0.656-0.810		ESCA	0.945	0.915-0.976		ESCA	0.892	0.842-0.942		ESCA	0.48	0.390-0.571		ESCA	0.595	0.507-0.682		ESCA	0.592	0.503-0.680		ESCA	0.782	0.711-0.853
GBM	0.869	0.814-0.924		GBM	0.633	0.549-0.717		GBM	0.778	0.709-0.847		GBM	0.86	0.806-0.914		GBM	0.52	0.432-0.609		GBM	0.53	0.442-0.618		GBM	0.737	0.662-0.812		GBM	0.8	0.735-0.865
HNSC	0.929	0.908-0.949		HNSC	0.78	0.740-0.820		HNSC	0.931	0.910-0.952		HNSC	0.909	0.883-0.935		HNSC	0.585	0.536-0.635		HNSC	0.602	0.552-0.651		HNSC	0.539	0.489-0.590		HNSC	0.793	0.754-0.832
KIRC	0.838	0.804-0.872		KIRC	0.666	0.621-0.712		KIRC	0.88	0.852-0.908		KIRC	0.836	0.803-0.869		KIRC	0.518	0.470-0.566		KIRC	0.495	0.448-0.543		KIRC	0.521	0.472-0.570		KIRC	0.837	0.803-0.870
KIRP	0.832	0.786-0.878		KIRP	0.659	0.596-0.722		KIRP	0.809	0.760-0.858		KIRP	0.8	0.750-0.850		KIRP	0.572	0.506-0.638		KIRP	0.595	0.529-0.660		KIRP	0.594	0.528-0.659		KIRP	0.87	0.829-0.910
LAML	0.557	0.464-0.649		LAML	0.743	0.665-0.822		LAML	0.556	0.463-0.648		LAML	0.876	0.824-0.929		LAML	0.489	0.406-0.572		LAML	0.499	0.414-0.584		LAML	0.685	0.598-0.771		LAML	0.682	0.597-0.768
LGG	0.822	0.787-0.858		LGG	0.757	0.716-0.798		LGG	0.81	0.773-0.846		LGG	0.743	0.702-0.785		LGG	0.537	0.488-0.586		LGG	0.54	0.491-0.590		LGG	0.686	0.641-0.731		LGG	0.859	0.827-0.891
LUAD	0.824	0.789-0.859		LUAD	0.755	0.713-0.797		LUAD	0.893	0.865-0.920		LUAD	0.861	0.829-0.893		LUAD	0.569	0.520-0.618		LUAD	0.549	0.500-0.598		LUAD	0.552	0.503-0.601		LUAD	0.841	0.807-0.876
LUSC	0.952	0.935-0.969		LUSC	0.7	0.655-0.746		LUSC	0.927	0.904-0.949		LUSC	0.928	0.907-0.950		LUSC	0.557	0.507-0.607		LUSC	0.649	0.601-0.697		LUSC	0.476	0.425-0.526		LUSC	0.842	0.808-0.877
OV	0.893	0.862-0.924		OV	0.807	0.764-0.850		OV	0.829	0.788-0.870		OV	0.903	0.874-0.933		OV	0.55	0.493-0.607		OV	0.561	0.504-0.618		OV	0.567	0.509-0.625		OV	0.925	0.900-0.950
PAAD	0.928	0.892-0.964		PAAD	0.773	0.704-0.842		PAAD	0.908	0.864-0.952		PAAD	0.929	0.894-0.964		PAAD	0.491	0.401-0.581		PAAD	0.553	0.468-0.638		PAAD	0.668	0.589-0.747		PAAD	0.854	0.800-0.909
PRAD	0.898	0.871-0.925		PRAD	0.793	0.754-0.832		PRAD	0.877	0.848-0.907		PRAD	0.87	0.839-0.901		PRAD	0.533	0.482-0.584		PRAD	0.534	0.483-0.585		PRAD	0.568	0.518-0.619		PRAD	0.868	0.838-0.899
SKCM	0.919	0.894-0.944		SKCM	0.872	0.840-0.903		SKCM	0.968	0.955-0.981		SKCM	0.8	0.758-0.842		SKCM	0.482	0.430-0.534		SKCM	0.576	0.525-0.628		SKCM	0.528	0.475-0.580		SKCM	0.923	0.899-0.946
STAD	0.93	0.906-0.954		STAD	0.774	0.726-0.821		STAD	0.879	0.845-0.914		STAD	0.837	0.796-0.878		STAD	0.58	0.522-0.639		STAD	0.622	0.565-0.679		STAD	0.563	0.505-0.621		STAD	0.898	0.868-0.928
TGCT	0.915	0.872-0.958		TGCT	0.947	0.917-0.978		TGCT	0.97	0.948-0.992		TGCT	0.971	0.948-0.994		TGCT	0.528	0.437-0.620		TGCT	0.697	0.615-0.779		TGCT	0.617	0.527-0.707		TGCT	0.958	0.931-0.984
THCA	0.921	0.899-0.943		THCA	0.804	0.766-0.842		THCA	0.848	0.816-0.881		THCA	0.962	0.947-0.976		THCA	0.473	0.423-0.523		THCA	0.502	0.451-0.552		THCA	0.568	0.517-0.618		THCA	0.908	0.884-0.933
THYM	0.766	0.678-0.853		THYM	0.554	0.447-0.660		THYM	0.809	0.729-0.889		THYM	0.616	0.513-0.718		THYM	0.802	0.719-0.886		THYM	0.546	0.441-0.651		THYM	0.494	0.389-0.599		THYM	0.665	0.567-0.763

## Sheet: Table S4 
Supplementary Table 4: Correlations of TASL expression with Immune checkpoints, TMB and MSI in 20 cancer types.
Immune checkpoints				TMB				MSI
Cancer Type	R value	P-value(Spearman)		Cancer Type	R value	P-value(Spearman)		Cancer Type	R value	P-value(Spearman)
ACC	0.661	<0.001		ACC	-0.204	0.078		ACC	-0.131	0.258
BRCA	0.73	<0.001		BRCA	0.009	0.777		BRCA	0.044	0.156
CESC	0.778	<0.001		CESC	0.005	0.955		CESC	0.101	0.08
ESCA	0.792	<0.001		ESCA	-0.113	0.166		ESCA	-0.13	0.101
GBM	0.729	<0.001		GBM	-0.163	0.047		GBM	-0.028	0.729
HNSC	0.826	<0.001		HNSC	-0.166	<0.001		HNSC	-0.1	0.026
KIRC	0.616	<0.001		KIRC	0.04	0.454		KIRC	0.011	0.842
KIRP	0.671	<0.001		KIRP	-0.062	0.31		KIRP	-0.072	0.226
LAML	0.161	0.048		LAML	-0.036	0.714		LAML	0.11	0.243
LGG	0.68	<0.001		LGG	0.068	0.13		LGG	-0.07	0.117
LUAD	0.612	<0.001		LUAD	-0.219	<0.001		LUAD	-0.069	0.12
LUSC	0.867	<0.001		LUSC	-0.11	0.018		LUSC	-0.269	<0.001
OV	0.776	<0.001		OV	0.152	0.017		OV	-0.167	0.005
PAAD	0.844	<0.001		PAAD	-0.258	0.001		PAAD	0.069	0.363
PRAD	0.767	<0.001		PRAD	0.032	0.489		PRAD	-0.042	0.35
SKCM	0.829	<0.001		SKCM	0.051	0.273		SKCM	0.004	0.932
STAD	0.762	<0.001		STAD	-0.16	0.002		STAD	-0.27	<0.001
TGCT	0.821	<0.001		TGCT	-0.124	0.165		TGCT	-0.335	<0.001
THCA	0.84	<0.001		THCA	-0.191	<0.001		THCA	-0.019	0.672
THYM	0.335	<0.001		THYM	-0.119	0.203		THYM	-0.005	0.957

## Sheet: Table S5 
Supplementary Table 5: Abbreviations, full names and sample sizes for 33 cancer types from the TCGA and GTEx databases
Cancer Type (Abbreviation)	Full name	Sample size
		Tumor	Normal
ACC	Adrenocortical carcinoma	77	128
BLCA	Bladder Urothelial Carcinoma	407	28
BRCA	Breast invasive carcinoma	1099	292
CESC	Cervical Squamous Cell Carcinoma and Endocervical Adenocarcinoma	306	13
CHOL	Cholangiocarcinoma	36	9
COAD	Colon adenocarcinoma	290	349
DLBC	Lymphoid Neoplasm Diffuse Large B-cell Lymphoma	47	444
ESCA	Esophageal Carcinoma	182	666
GBM	Glioblastoma Multiforme	166	1157
HNSC	Head and Neck Squamous Cell Carcinoma	520	44
KICH	Kidney Chromophobe	66	53
KIRC	Kidney Renal Clear Cell Carcinoma	531	100
KIRP	Kidney Renal Papillary Cell Carcinoma	289	60
LAML	Acute Myeloid Leukemia	173	70
LGG	Brain Lower Grade Glioma	523	1152
LIHC	Hepatocellular Carcinoma	371	160
LUAD	Lung Adenocarcinoma	515	347
LUSC	Lung Squamous Cell Carcinoma	498	338
MESO	Mesothelioma	87	0
OV	Ovarian serous cystadenocarcinoma	427	88
PAAD	Pancreatic Adenocarcinoma	179	171
PCPG	Pheochromocytoma and Paraganglioma	182	3
PRAD	Prostate Adenocarcinoma	496	152
READ	Rectum adenocarcinoma	93	318
SARC	Sarcoma	262	2
SKCM	Skin Cutaneous Melanoma	469	813
STAD	Stomach Adenocarcinoma	414	210
TGCT	Testicular Germ Cell Tumors	154	165
THCA	Thyroid Carcinoma	512	338
THYM	Thymoma	119	446
UCEC	Uterine Corpus Endometrial Carcinoma	181	101
UCS	Uterine Carcinosarcoma	57	78
UVM	Uveal Melanoma	79	0

## Sheet: Table S6 
Supplementary Table 6: The original data (E_ normalized values) of TASL expression from GEO datasets used in Figure 6D.
ACC-Normal	ACC-Tumor	BRCA-Normal	BRCA-Tumor	CESC-Normal	CESC-Tumor	ESCA-Normal	ESCA-Tumor	GBM-Normal	GBM-Tumor	HNSC-Normal	HNSC-Tumor	KIRC-Normal	KIRC-Tumor	KIRP-Normal	KIRP-Tumor	LAML-Normal	LAML-Tumor	LGG-Normal	LGG-Tumor	LUAD-Normal	LUAD-Tumor	LUSC-Normal	LUSC-Tumor	OV-Normal	OV-Tumor	PAAD-Normal	PAAD-Tumor	PRAD-Normal	PRAD-Tumor	SKCM-Normal	SKCM-Tumor	STAD-Normal	STAD-Tumor	TGCT-Normal	TGCT-Tumor	THCA-Normal	THCA-Tumor	THYM-Normal	THYM-Tumor
0.61662	0.467929	0.395602	0.0164449	0.616477	0.542841	0	0.22965	0.235163	0.708435	0.15323	0.242416	0.163303	0.548753	0.654492	0.690457	0.20531	0.520787	0.23394	0.90247	0.658056	0.260204	0.604241	0.567316	0.150646	0	0.771205	0.788487	0.819294	0.250792	0.17411	0.29123	0.656237	0.148368	0.583886	0.847044	0.252231	0.308455	0.560101	0.448899
0.404849	0.237214	0.810606	0.368625	0.0937508	0.452071	0.129751	0.129172	0.419796	0.753584	0.186184	0.0883994	0.151155	0.685055	0.546561	0.714938	0.298858	0.251018	0.417612	0.62174	0.400994	0.039953	1	0.223231	0.162122	0.0327064	1	0.819226	1	0.794202	0.272957	0.319212	0.897278	0.0219975	0.529737	0.583886	0.0724993	0.366384	0.766814	0.620072
0.20913	0.25696	0.442166	0.274021	0.292252	0.385666	0.161454	0.0932522	0.730957	0.808991	0.238271	0.320056	0.161799	0.720945	0.159061	0.790522	0.360861	0.607931	0.727155	0.878275	0.443156	0.245269	0.453956	0.289207	0.183476	0.0480992	0.226719	0.522349	0.702442	0	0.146809	0.259621	0.597424	0.00342438	0.53171	0.701602	0.311749	0.298489	0.511634	0.0753054
0	0.406089	0.302661	0.593126	0.345809	1	0.180846	0.154071	0.793901	0.880284	0.142138	0.0994508	0.216863	0.594892	0.419086	0.769252	0.321386	0.703847	0.789772	0.802252	0.291244	0.38463	0.543317	0.240359	0.237132	0.0570791	0.243239	0.432243	0.462065	0.309666	0.619717	0.397491	0.282016	0.421345	0.256755	0.220185	0.0653975	0.122215	0.53456	0.584747
	0.600711	0.289542	0.51201	0.409153	0	0.176069	0.150805	0.561207	0.966965	0.539302	0.0689402	0.272144	0.492778	0.559504	0.643141	0.163108	0.456191	0.558288	0.414635	0.383996	0.120434	0.922829	0.333001	0.295702	0.0788329	0.423773	0.64334	0.582141	0.112784	0.244285	0.41381	0.369717	0.123876	0.335556	0		1	0.435123	0.298754
	0.402568	0.425351	0.521064	0.57738	0.644554	0.108182	0.170596	0.731191	0.771777	0.221262	0.462888	0.311766	0.331854		0.840996	0.585904	0.781615	0.727388	0.871667	0.454406	0.123143	0.645619	0.27174	0.331221	0.112588	0.062665	0.494888	0.298169	0.369901	0.238177	0.308876	0.156047	0.382899	0.108777	0.187234		0.602789	0.334148	0.733408
	0.383319	0.566704	0.486881	0.398601	0.530856	0.15686	0.149842	0.770033	0.779335	0.342529	0.372256	0.48619	0.824269		0.725585	0.207023	0.505734	0.766028	0.747138	0.671175	0.37119	0.623196	0.570215		0.113587	0.0692145	0.424012		0.447171	0.458279	0.345598	0.863821	0.0798034	0.284963	0.495341		0.554253	0.878458	0.355999
	0.621516	0.31966	0.394124	0.505682	0.674232	0.103153	0.183165	0.319347	0.622031	0.301195	0.319411	0.345262	0.991504		0.249397	0.482833	0.36381	0.317686	0.510309	0.0482178	0.451089	0.638027	0.388384		0.159332	0.78949	0.433983			0.41044	0.276876	0.18788	0.158247		0.299945		0.348513	0.360797	0.392078
	0.345856	0.252402	0.333333	0.413804	0.827109	0.26967	0.21681	0.798952	0.640516	0.458026	0.391055	0.532905	0.878627		0.280307	0.295047	0.720367	0.794797	0.768875	0.560574	0.583886	0.840559	0.407204		0.167062	0.141939	0.375394			0.148659	0.289655	0.258689	0.118583		0.0931604		0.464705	0.838761	0.526243
	0.672902	0.322986	0.517369	0.117071	0.666304	0.27795	0.0479101	0.428794	0.898769	0.230098	0.4973	0.308511	0.399658		0.866545	0.314195	0.608599	0.426564	0.75413	0.284337	0.375266	0.462103	0.659736		0.172455	0.655811	0.600079			0	0.405573	0.642711	0.478594		0.397154		0.716891		0.639573
	0.442757	0.182742	0.367517	0.537773	0.582887	0.132697	0.139841	0	0.738563	0.212831	0.544085	0.40821	1		0.625578	0.334525	0.71857	0	0.738857	0.552846	0.418257	0.523858	0.349656		0.184854	0.493073	0.610558			0.227792	0.323926	0.44356	0.382659		0.223231		0.668476		0.177117
	0.261621	0.380081	0.441426	0.388229	0.781349	0.243409	0.273469	0.318372	0.63733	0.0807059	0.161687	0.167231	0.579464		0.860856	0.468301	0.658853	0.316716	0.837122	0.205838	0.286703	0.433655	0.479137		0.189592	0.49064	0.539836			0.105964	0.832039	0.161985	0.132387		0.542503		0.901922		0.521454
	0.581644	0.343865	0.255543	0.579661	0.586549	0.184509	0.117201	0.481029	0.776616	0.24346	0.556175	0.396058	0.357935		0.791354	0.226113	0.752629	0.478527	0.826012	0.762103	0.473372	0.596815	0.702259		0.195602	0.669588	0.521985			0.254782	0.601579	0.36444	0.541278		0.322856		0.50721		1
	0.553365	0.281596	0.357908	0.599709	0.560644	0.138676	0.165294	0.846293	0.811988	0.401609	0.333213	0.330186	0.744857		0.926222	0.420143	0.462663	0.841892	0.615631	0.674416	0.403582	0.28556	0.539237		0.198963	0.308292	0.58298			0.0524018	0.162525	0.0955494	0.39074		0.299163		0.398034		0.314618
	0.225576	0.469512	0.554878	0.625536	0.530447	0.164139	0.170788	0.606433	0.826713	0.192828	0.248544	0.688523	0.746134		0	0.413281	0.648564	0.603279	0.726359	0.308733	0.201318		0.4213		0.222331	0.335851	0.515773			0.983872	0.443839	0.139634	0.0600824		0.222971		0.129432		0
	0.113756	0.34442	0.528825	0.635576	0.463852	0.098986	0.208301	0.518813	0.588867	0.258101	0.0473262	0.0416578	0.652497		0.159609	0.238958	0.223591	0.516115	0.800417	0.388721	0.324842		0.0233552		0.227048	0.53119	0.548305			0.360721	0.268929	0.184317	0.239053		0.866567		0.308152		0.50382
	0.601083	0.221914	0.789172	0.627174	0.578519	0.152964	0.0862469	0.573335	0.703047	0.216594	0.211194	0.359544	0.298799		0.708135	0.456506	0.698574	0.570353	0.905023	0.494861	0.526456		0.306549		0.23669	0.237255	0.571666				0.275051	0.11314	0.0566697		1		0		0.278466
	0.213996	0.134516	0.548965	0.532822	0.921926	0.0921885	0.155424	0.695119	0.675433	0.158705	0.246358	0.170434	0.69505		1	0.385611	0.523839	0.691504	0.75794	0.422097	0.407682		0.429613		0.254679	0.278591	0.432114				0.322116	0.18788	0.149114		0.645662		0.265949		0.21325
	0.434502	0.490761	0.464708	0.557647	0.633664	0.133052	0.128316	0.649098	0.647764	0.195139	0.330853	0.0989646	0.695198		0.893691	0.265949	0.425897	0.645722	1	0.375993	0.217471		0.399519		0.266571	0.279532	0.755776				0.283124	0.401504	0.0627099		0.207926		0.70557		0.355464
	0.629954	0.373984	0.670547	0.548461	0.427149	0.123523	0.326295	0.820653	0.760938	0.296122	0.232024	0.227907	0.298271			0.343425	0.839915	0.816385	0.671167	0.212598	0.310317		0.2192		0.309102	0.250766	0.483323				0.26455		0.824203		0.412292		0.602573		0.357169
	0.527291	0.483555	0.532151	0.670538	0.53825	0.0550286	0.206025	0.692832	0.779248	0.0565902	0.267055	0.102274	0.584095			0.25686	0.513642	0.689229	0.810166	0.498771	0.463104		0.579299		0.311725	0.46998	0.569711				1		0.0833887		0.132926		0.382597		0.175109
	0.479135	0.446231	0.374169		0.911232	0.175565	0.183672	0.633648	0.61933	0.171139	0.0948839	0.105059	0.708585			0.366555	0.433355	0.630352	0.900703	0.471469	0.426658		0.308808		0.329159	0.583621	0.650576				0.311856		0.111547		0.390011		0.391948		0.232219
	0.588176	0.505728	0.634516		0.509555	0.216882	0.290916	0.769018	0.581697		0.38379	0	0.551999			0.647943	0.720958	0.765019	0.426127	0.61019	0.385306		0.41066		0.32924	0.31041	0.663931				0.262606		0.301368		0.571966		0.261634		0.0603614
	0.55935	0.603843	0.46748		0.735652	0.213698	0.18252		0.840136		0.203359		0.401855			0.44842	0.391832		0.755481	0.503016	0.333139		0.461947		0.331221	0.225103	0.379813				0.356302		0.105627				0.315023		0.03003
	0.868181	0.165004	0.241685		0.408982	0.0480957	0.15044		0.784695		0.500302		0.564198			0.462825	0.708936		0.526032	0.44577	0.426658		0.268189		0.334025	0.196864	0.479078				0.302245		0.933703				0.211342		0.580424
	0.731149	0.435144	0.369364		0.609756	0.190136	0.366073		0.807415		0.545228		0.761786			0.468301	0.560617		0.937426	0.311734	0.428441		0.44008		0.368739	0	0.371227				0.375114		0.207853				0.0445626		0.568916
	0.407701	0.332409	0.570769		0.622877	0.0088431	0.0910745		0.646222		0.0662243		0.31541			0.428117	0.410999		0.825644	0.540241	0.585036		0.301911		0.374559	0.0862161	0.819073				0.619869		0.470199				0.0915285		0.118534
	1	0.283629	0.269956		0.579016	0.17712	0.169599		0.773881		0.278537		0.717924			0.342025	0.646094		0.567441	0.564335	0.749057		0.574639		0.413323	0.228301	0.504639				0.337523		0.618035				0.158786		0.837452
	0.386009	0.423873	0.339431		0.575364		0.158634		0.737075		0.554116		0.477382			0.260106	0.236882		0.830285	0.479835	0.357454		0.512653		0.417013	0.672639	0.526828				0.295429		0.433392				0.643651		0.321813
	0.530936	0.354952	0.788987		0.543064		0.172097		1		0.222754		0.724007			0.232354	0.642415		0.8254	0.344239	0.568929		0.514914		0.418047	0.739927	0.510872				0.397997		0.170099				0.318294		0.381975
	0.763311	0.3034	0.624353		0.561923		0.0607247		0.836036		0.369661		0.886581			0.337691	0.796133		0.930108	0.378093	0.239312		0.3094		0.435282	0.330893	0.369455				0.419629		0.178095				0.658417		0.199087
	0.615284	0.463415	0.264043		0.668961		0.360886		0.96158		0.190835		0.614093			0.618472	0.520112		0.554887	0.831179	0.334607		0.3445		0.467655	0.506558	0.483945				0.158824		0.114729				0.720568		0.711906
	0.438646	0.099963	0.269401		0.508778		0.245278		0.701577		0.0523675					0.691686	0.441639		0.935005	0.573907	0.656204		0.567468		0.474048	0.320249	0.526828				0.312613		0.21998				0.868305		0.00639672
	0.546712	0.516445	0.4551				0.164815		0.930586		0.505974					0.409708	0.37821		0.942599	1	0.449746		0.733353		0.49396	0.186774	0.528857				0.171973		0.575064				0.230436		0.218918
	0.623747	0.402993	0.411308				0.12053		0.925337		0.240758					0.467822	0.563566		0.77583	0.573907	0.350953		0.386901		0.641063	0.346136	0.684379				0.387591		0.515274				0.720833		0.558965
	0.339396	0.425905	0.510532				0.280603		0.824628		0.470694					0.282206	0.45297		0.568846	0.180393	0.277771		0.184002		0.73859	0.712412	0.602591				0.437829		0.74628				0.72524		0.370737
	0.504524	0.325573	0.541574				0.140652		0.83638		0.41398					0.312224	0.397915		0.72253	0.385915	0.228769		0.510594		0.772409	0.291096	0.672042				0.321706		0.375983				0.498326		0.372639
	0.232904	0.0896157	0.489837				0.224385		0.910452		0.716734					0.34931	0.439225		0.800459	0.512452	0.339119		0.213125		0.848199	0.0541757	0.729672				0.506322		0.447692				0.238379		0.950617
	0.266351	0.196046	0.191242				0.324885		0.981973		0.342801					0.283232	0.389728		0.682308	0.515619	0.418962		0.542648		0.865451	0.93658	0.419019				0.65975		0.44356				0.0310065		0.291564
	0.446457	0.310052	0.412047				0.302063		0.708031		0.706648					0.537167	0.349458		0.888726	0.553106	0.785869		0.61174		0.88962						0.569402		0.0826523				0.290099		0.453423
	0.464924	0.578344	0.470621				0.234742		0.760938		0					0.0548018	0.563113		0.718456	0.491717	0.849175		0.221654		0.945215						0.324142		0.069978				0.344599
	0.439748	0.351072	0.472284				0.236872		0.739667		0.744358					0.37383	0.314932		0.644915	0.680827	0.562282		0.356302		0.98318						0.624181		0.535904				0.181183
	0.78823	0.259793	0.498522				0.367571		0.706519		0.667183					0.511384	0.404487		0.663786	0.295699	0.433586		0.372521		1						0.39177		0.22461				0.132892
	0.485082	0.325018	0.367886				0.0740712		0.818515		0.556308					0.472777	0.850155		0.760434	0.506005	0.570105		0.473927								0.361021		0.307991				0.361389
		0.255543	0.446785				0.804413		0.676844		0.611886					0.159319	0.703733		0.497919	0.707782	0.0788672		0.349656								0.593668		0.724566				0.228649
		0.183481	0.211013				0.246704		0.548285		0.744095					0.581863	0.601151		0.696386	0.518134	0.436309		0.396955								0.640112		0.638151				0.342863
		0.255358	0.38119				0.580202		0.706885		0.75678					0.380302	0.0384231		0.757728	0.4811	0		0.420996								0.54546		0				0.220825
		0.296933	0.463969				0.412743		0.687858		0.805313					0.638256	0.172876		0.627272	0.768379	0.0896685		0.307912								0.47639		0.183272				0.256641
		0.387842	0.435144				0.539693		0.66222		0.75667					0.134922	0.532268		0.723597	0.565464	0.472493		0.427295								0.453558		0.372735				0.349841
		0.50425	0.613821				0.287627		0.793776		1					0.126593	0.5749		0.82046		0.474034		0.364061								0.852776		0.154944				0.425937
		0.408167	0.755543				0.0973653		0.818515		0.853969					0.374199	0.195991		0.745846		0.494861		0.485037								0.428764		0.114134				0.206642
		0.44235	0.332225				0.146814		0.425146		0.52939					0.567238	0.573363		0.696298		0.606775		0.230039								0.381179		0.171262				0.313831
		0.361789	0.225425				0.249646		0.6776		0.587646					0.270142	0.520705		0.563774		0.46475		0.224966								0.306043		0.0727747				0.345326
		0.279194	0.505358				0.376464		0.772895		0.583507					0.554065	0.384343		0.646893		0.289689		0.193446								0.689849		0.681792				0.306933
		0.509978	0.469697				0.266967		0.709727		0.863644					0.342171	0.300026		0.516231		0.242057		0.365063								0.322502		0.319301				0.196785
		0.437731	0.517923				0.12505		0.514227		0.2712					0.488117	0.129462		0.474563		0.809421		0.448276								0.766782		0.271592				0.250475
		0.50813	0.469697				0.162678		0.631186		0.221299					0.299074	0.589793		0.662837		0.622506		0.156498								0.379045		1				0.2097
		0.608093	0.449372				0.392243		0.472473							0.382239	0.548178		0.80745		0.531556		0.519989								0.482489		0.135736				0.381197
		0.381929	0.261826				0.106948		0.911296							0.386132	0.344461		0.841685				0										0.140769				0.386624
		0.637657	0.594974				0.237174		0.791386							0.304956	0.258778		0.597484				0.380618										0.401912				0.242153
		0.3034	0.494272				0.0937054		0.72186							0.573089	0.218608		0.575513				0.337833										0.167767				0.353452
		0.286216	0.618625				0.188647		0.558657							0.384269	0.570472		0.454557														0.638751				0.312429
		0.277716	0.675166				0.194592		0.913356							0.117222	0.338274		0.539489														0.613536				0.534137
		0.613821	0.690318				0.300055		0.822932							0.427274	0.315445		0.77994														0.537535				0.663613
		0.395233	0.329084				0.30396		0.717755							0.231685	0.379404		0.649218														0.300737				0.196676
		0.460828	0.66796				1		0.403524							0.407202	0.551062		0.737254																		0.2692
		0.68422	0.740576				0.329813		0.894965							0.307599	0.563023		0.812689																		0.274602
		0.560421	0.717664				0.066298		0.598881							0.315964	0.149929		0.391994																		0.209123
		0.322432	0.388766				0.204449		0.780964							0.252937	0.370412		0.458253																		0.372516
		0.462306	0.547118				0.411088		0.810863							0.310683	0.546081		0.849213																		0.324817
		0.386364	0.434775				0.186895		0.769827							0.353672	0.368925		0.608489																		0.444719
		0.43071	0.535107				0.511962		0.750642							0.362255	0.629526		0.673461																		0.294064
		0.454361	0.425905				0.36178		0.657982							0.263059	0.449125		0.853532																		0.245541
		0.36493	0.377679				0.240356		0.747478							0.198616	0.0916058		0.774618																		0.284417
		0.29139	0.1966				0.165781		0.557497								0.619158		0.804658																		0.586124
		0.173503	0.282705						0.901381								0.112924		0.61616																		0.501388
		0.237805	0.320953						0.710258								0.279258																				0.328205
		0.109017	0.268847														0.57146																				0.662196
		0.385625	0.310052														0.532614
		0.20861	0.397635														0.651774
		0.124723	0.175166														0.84846
		0.219327	0.203622														0.540098
		0.376201	0.272912														0.498319
		0.184959	0.212491														0.761655
		0.592018	0.789172														0.44546
		0.199741	0.464893														0.580663
		0.379712	0.498152														0.543129
		0.338877	0.384885														0.76875
		0.406689	0.246305														0.467105
		0.338507	0.439394														0.663914
		0.515336	0.317812														0.550799
		0.474316	0.574649														0.487958
		0.492424	0.43034														0.606485
		0.381559	0.366223														0.626441
		0.287509	0.709904														0.504494
		0.310237	0.460089														0.741439
		0.38119	0.390983														0.576447
		0.197524	0.452143														0.656444
		0.182003	0.69272														0.517922
		0.310976	0.357724														0.679616
		0.487435	0.353843														0.280294
		0.332594	0.370658														0.572364
		0.509424	0.467295														0.484795
		0.305063	0.505543														0.546343
		0.315225	0.308204														0.66838
		0.249815	0.346637														0.593429
		0.204176	0.513858														0.740437
		0.273651	0.230599														0.53691
		0.0947894	0.21323														0.520198
		0.158352	0.41408														0.485921
		0.187546	0.390429														0.769563
		0.199926	0.306171														0.589236
		0.230229	0.371951														0.877835
		0.321138	0.387842														0.573363
		0.273466	0.485957														0.713709
		0.358093	0														0.781052
		0.183112	0.474871														0.848631
		0.235772	0.390798														0.370931
		0.254804	0.150776														0.609947
		0.36881	0.828899														0.871718
		0.195122	0.401515														0.560707
		0.331116	0.491316														0.447484
		0.408906	0.436253														0.54252
		0.310791	0.659091														0.4856
		0.166297	0.545824														0.521801
		0.238729	0.277347														0.632816
		0.316704	0.364191														0.906645
		0.31153	0.515336														0.625647
		0.336475	0.558019														0.736332
		0.427568	0.533444														0.722042
		0.383038	0.328344														0.667208
		0.370658	1														0.303925
		0.301367	0.341833														0.214494
		0.343865	0.509054														0.394373
		0.37731	0.150961														0.7466
		0.453437	0.39782														0.634922
		0.217849	0.476534														0.386965
		0.24575	0.376201														0.67766
		0.388766	0.424427														0.694386
		0.444752	0.733925														0.299661
		0.630081	0.554693														0.317645
		0.554693	0.357354														0.605048
		0.310791	0.373984														0.67864
		0.629897															0.689568
		0.390429															0.394896
																	0.583696
																	0.551326
																	0.297395
																	0.757311
																	0.120544
																	0.69869
																	0.47993
																	0.604191
																	0.353522
																	0.540184
																	0.700405
																	0.726035
																	0.619743
																	0.791234
																	0.700405
																	0.446708
																	0
																	0.234065
																	0.488521
																	0.425897
																	0.584253
																	0.0292156
																	0.555205
																	0.28587
																	0.290861
																	0.771038
																	0.270805
																	0.526546
																	0.469978
																	0.579474
																	0.420065
																	0.511635
																	0.317862
																	0.678748
																	0.43946
																	0.128791
																	0.511801
																	0.275297
																	0.484632
																	0.429818
																	0.470138
																	0.738938
																	0.431201
																	0.584253
																	0.0392756
																	0.321314
																	0.556351
																	0.298567
																	0.604668
																	0.779663
																	0.614864
																	0.602105
																	0.470537
																	0.760465
																	0.753142
																	0.431734
																	0.269924
																	0.337324
																	0.261807
																	0.423357
																	0.659061
																	0.694837
																	0.383141
																	0.467105
																	0.467664
																	0.623085
																	0.425282
																	0.719293
																	0.790653
																	0.338499
																	0.320214
																	0.514807
																	0.272869
																	0.394373
																	0.692701
																	0.477273
																	0.607449
																	0.474703
																	0.676132
																	0.59483
																	0.452419
																	0.610911
																	0.432661
																	0.497259
																	0.588118
																	0.460367
																	0.741563
																	0.223961
																	0.377833
																	0.308262
																	0.575351
																	0.331446
																	0.258113
																	0.619646
																	0.359592
																	0.347545
																	0.320142
																	0.888138
																	0.40728
																	0.33357
																	0.320659
																	0.652704
																	0.566247
																	0.637751
																	0.529525
																	0.421746
																	0.474464
																	0.499625
																	0.599442
																	0.564191
																	0.48001
																	0.713358
																	0.54252
																	0.350636
																	0.232951
																	0.531577
																	0.272869
																	0.223444
																	0.570831
																	0.955789
																	0.330779
																	0.331664
																	0.578645
																	0.301717
																	0.208295
																	0.790513
																	0.518171
																	0.682471
																	0.438327
																	0.237099
																	0.632213
																	0.572999
																	0.391682
																	0.432271
																	0.892043
																	0.623381
																	0.362628
																	0.435897
																	0.551326
																	0.868432
																	0.564546
																	0.303851
																	0.363367
																	0.324834
																	0.562754
																	0.412523
																	0.744586
																	0.751344
																	0.344682
																	0.266173
																	0.516321
																	0.774576
																	0.691018
																	0.343944
																	0.529441
																	0.38606
																	0.370111
																	0.531749
																	0.479609
																	0.381345
																	0.366256
																	0.488848
																	0.231835
																	0.35278
																	0.304367
																	0.793965
																	0.38838
																	1
																	0.320288
																	0.37494
																	0.199375
																	0.531919
																	0.591929
																	0.226261
																	0.699259
																	0.687462
																	0.577451
																	0.356932
																	0.285576
																	0.751597
																	0.786966
																	0.406749
																	0.691686
																	0.632712
																	0.741687
																	0.315521
																	0.500279
																	0.353149
																	0.282576
																	0.426428
																	0.607931
																	0.241773
																	0.614762
																	0.691686
																	0.734965
																	0.470379
																	0.32711
																	0.961235
																	0.312296
																	0.669343
																	0.727245
																	0.382239
																	0.399043
																	0.371005
																	0.671273
																	0.640684
																	0.5103
																	0.785544
																	0.433431
																	0.568312
																	0.463064
																	0.254861
																	0.543129
																	0.440624
																	0.597831
																	0.456821
																	0.446238
																	0.430892
																	0.533043
																	0.63593
																	0.756399
																	0.314123
																	0.299737
																	0.618472
																	0.681702
																	0.249982
																	0.276397
																	0.524091
																	0.213593
																	0.638967
																	0.716542
																	0.290641
																	0.212922
																	0.585996
																	0.239329
																	0.439065
																	0.537341
																	0.519186
																	0.260182
																	0.543999
																	0.653637
																	0.426122
																	0.552388
																	0.736083
																	0.784836
																	0.862315
																	0.818936
																	0.436669
																	0.431201
																	0.576355
																	0.827745
																	0.496848
																	0.395196
																	0.572364
																	0.753657
																	0.585812
																	0.245704
																	0.59249
																	0.580116
																	0.602862
																	0.658959
																	0.535103
																	0.689902
																	0.726275
																	0.79788
																	0.605914
																	0.129165
																	0.193663
																	0.427734
																	0.353964
																	0.53691
																	0.358555
																	0.5884
																	0.130143
																	0.32601
																	0.099873
																	0.432896
																	0.822051
																	0.619452
																	0.855295
																	0.628825
																	0.0860698
																	0.355076
																	0.48114
																	0.629626
																	0.447099
																	0.377833
																	0.650225
																	0.636737
																	0.548966
																	0.359741
																	0.415639
																	0.77814
																	0.428969
																	0.335996
																	0.392059
																	0.675807
																	0.555205
																	0.472697
																	0.635024
																	0.350121
																	0.651774
																	0.549837
																	0.0690443
																	0.221433
																	0.599442
																	0.348793
																	0.601151
																	0.617787
																	0.745464
																	0.505895
																	0.143657
																	0.770769
																	0.25656
																	0.389953
																	0.433741
																	0.398594
																	0.653327
																	0.424972
																	0.436823
																	0.465364
																	0.163565
																	0.52705
																	0.368106
																	0.10839
																	0.509303
																	0.432896
																	0.784836
																	0.39378
																	0.578555
																	0.463064
																	0.505814
																	0.214118
																	0.844071
																	0.321386
																	0.458159
																	0.516826
																	0.519437
																	0.370412
																	0.516488
																	0.393481
																	0.424587
																	0.61149
																	0.495372
																	0.740186
																	0.359889
																	0.377535
																	0.244368
																	0.327986
																	0.5538
																	0.540705
																	0.396102
																	0.379853
																	0.236512
																	0.185615
																	0.459107
																	0.319557
																	0.234729
																	0.685573
																	0.537082
																	0.568847
																	0.292115
																	0.0582316
																	0.368476
																	0.296956
																	0.575351
																	0.555385
																	0.255009
																	0.535532
																	0.465204
																	0.249245
																	0.393405
																	0.251831
																	0.283746
																	0.48763
																	0.544608
																	0.545732
																	0.512472
																	0.349897
																	0.729323
																	0.384269
																	0.37963
																	0.43189
																	0.508968
																	0.554418
																	0.355152
																	0.45525
																	0.333866
																	0.337908
																	0.386284
																	0.236808
																	0.33152
																	0.348278
																	0.465759
																	0.497259
																	0.391305
																	0.438911

## Sheet: Table S7 
Supplementary Table 7: List of datasets from GEO, CGGA, and the article of Miao D, et al. involved in this study.
Datasets types	Accession	Title	Cancer Type	Project (Abbreviations)	Data type of expression	Available Cases per Data Category Used in Study
						Tumor	Normal	P-value (Mann-Whitney U,TASL)
Validation datasets	GSE19750	Adrenocortical Carcinoma Gene Expression Profiling [Affymetrix]	Adrenocortical Carcinoma	ACC	microarray data	44	4	0.156
	GSE70947	Age and estrogen-dependent inflammation in breast adenocarcinoma and normal breast tissue [cohort_2]	Breast Adenocarcinoma	BRCA	microarray data	143	145	< 0.001
	GSE9750	Identification of gene expression profiles in cervical cancer	Cervical squamous cell carcinoma and endocervical adenocarcinoma	CESC	microarray data	33	21	0.046
	GSE13898	Robust prognostic biomarkers for EAC identified by systems-level characterization of tumor transcriptome	Esophageal Carcinoma	ESCA	microarray data	75	28	0.002
	GSE4290	Expression data of glioma samples from Henry Ford Hospital	Glioblastoma multiforme	GBM	microarray data	77	23	0.001
	GSE25099	Expression data from 57 patients with oral cancer and 22 normal persons	Head and Neck squamous cell carcinoma	HNSC	microarray data	57	22	0.002
	GSE15641	Gene signatures of progression and metastasis in renal cell cancer	Kidney Renal Clear Cell Carcinoma	KIRC	microarray data	32	23	< 0.001
	GSE11151	Gene expression data from different types of renal tumors and normal kidneys	Kidney Renal Papillary Cell Carcinoma	KIRP	microarray data	19	5	0.044
	GSE13159	Microarray Innovations in LEukemia (MILE) study: Stage 1 data	Acute Myeloid Leukemia	LAML	microarray data	542	74	< 0.001
	GSE4290	Expression data of glioma samples from Henry Ford Hospital	Lower Grade GLioma	LGG	microarray data	76	23	0.007
	GSE10072	Gene expression signature of cigarette smoking and its role in lung adenocarcinoma development and survival	Lung Adenocarcinoma	LUAD	microarray data	58	49	0.013
	GSE30219	"Off-context" gene expression in lung cancer identifies a group of metastatic-prone tumors	Lung Squamous Cell Carcinoma	LUSC	microarray data	61	14	< 0.001
	GSE27651	The Anterior Gradient Homolog 3 (AGR3) Gene Is Associated with Differentiation and Survival in Ovarian Cancer	Ovarian serous cystadenocarcinoma	OV	microarray data	43	6	0.18
	GSE15471	Whole-Tissue Gene Expression Study of Pancreatic Ductal Adenocarcinoma	Pancreatic Adenocarcinoma	PAAD	microarray data	39	39	0.001
	GSE3325	Integrative Genomic and Proteomic Analysis of Prostate Cancer Reveals Signatures of Metastatic Progression	Prostate Carcinoma	PRAD	microarray data	7	6	0.051
	GSE15605	Transcriptome profiling identifies HMGA2 as a novel gene in melanoma progression	Skin Cutaneous Melanoma	SKCM	microarray data	58	16	0.002
	GSE13861	Gene expression signature-based novel prognostic risk score in gastric cancer	Stomach adenocarcinoma	STAD	microarray data	65	19	0.333
	GSE18155	Malignant Germ Cell Tumors Display Common microRNA Profiles Resulting in Global Changes in Expression of mRNA Targets	Testicular Germ Cell Tumors	TGCT	microarray data	23	7	0.864
	GSE27155	Human thyroid adenomas, carcinomas, and normals	Thyroid carcinoma	THCA	microarray data	78	4	0.044
	GSE2549	Malignant pleural mesothelioma	Thymoma	THYM	microarray data	40	9	0.039
Validation datasets for OS and clinical correlaton of LGG	mRNAseq_325	——	Lower Grade GLioma	LGG	RNA-seq	182	——	——
Validation datasets for OS and clinical correlaton of LUAD	GSE72094	KRAS mutation-associated gene expression, p53 and STK11 mutations, proliferation and immune surveillance in lung adenocarcinoma	Lung Adenocarcinoma	LUAD	microarray data	393	——	——
Validation datasets for OS of SKCM	GSE65904	Whole-genome expression analysis of melanoma tumor biopsies from a population-based cohort.	Skin Cutaneous Melanoma	SKCM	microarray data	210	——	——
Validation datasets for clinical correlaton of SKCM	GSE46517	Human melanoma samples comparing nevi and primary and metastatic melanoma	Skin Cutaneous Melanoma	SKCM	microarray data	82	——	——
The immunotherapy response datasets	GSE19423	Predictive Gene Signatures as Strong Prognostic Indicators of the Effectiveness of BCG Immunotherapy	Bladder Urothelial Carcinoma	BLCA	microarray data	48	——	——
	GSE111636	Identification of potential biomarkers of response and resistance to programmed cell death-1 blockade in patients with advanced urothelial tumors	Bladder Urothelial Carcinoma	BLCA	microarray data	11	——	——
	GSE67501	Expression data in human renal cell carcinoma samples from patients who did or did not respond to anti-PD-1 (Nivolumab) immunotherapy	Renal Cell Carcinoma	RCC	microarray data	11	——	——
	Miao D, et al.（aPD1）	Genomic correlates of response to immune checkpoint therapies in clear cell renal cell carcinoma	Kidney Renal Clear Cell Carcinoma	KIRC	RNA-seq	16	——	——
	GSE100797	Mutational and neoantigen load predict clinical benefit of adoptive T cell therapy in melanoma	Skin Cutaneous Melanoma	SKCM	RNA-seq	25	——	——
	GSE91061	Molecular portraits of tumor mutational and micro-environmental sculpting by immune checkpoint blockade therapy	Skin Cutaneous Melanoma	SKCM	microarray data	51	——	——
	GSE91061（aCTLA4 prog aPD1）	Molecular portraits of tumor mutational and micro-environmental sculpting by immune checkpoint blockade therapy	Skin Cutaneous Melanoma	SKCM	microarray data	26	——	——
	GSE121810	Neoadjuvant anti-PD-1 immunotherapy promotes a survival benefit with intratumoral and systemic immune responses in recurrent glioblastoma	Glioblastoma multiforme	GBM	RNA-seq	26	——	——

## Sheet: Table S8 
Supplementary Table 8: List of gene sets.
CYT: immune cytolytic activity，CCR:Cytokine and Cytokine Receptor，HLA: human leukocyte antigen，TIL: tumor-infiltrating lymphocyte，IFN: interferon response.
Immune signatures						Glycolysis		Checkpoint genes		Immunocyte signatures
CYT	CCR	HLA	TIL	IFN		HK3		IDO1		B cells	T cells	T helper cells	Tcm	Tem	Th1 cells	Th2 cells	TFH	Th17 cells	Tgd	Cytotoxic cells	NK cells	NK CD56dim cells	NK CD56bright cells	DC	iDC	aDC	pDC	Eosinophils	Macrophages	Mast cells	Neutrophils
PRF1	CCL16	HLA-E	ITM2C	JAK2		HK1		LAG3		MS4A1	PRKCQ	ICOS	CDC14A	TRAC	IFNG	PMCH	CHI3L2	IL17A	TRDC	KLRD1	LOC643313	KIR3DL2	DUSP4	CD209	CD1B	CCL1	IL3RA	IL5RA	MARCO	PRG2	CSF3R
GZMA	TPO	HLA-DPB2	CD38	IRF1		HK2		CTLA4		TCL1A	CD3D	LRBA	ATM	PRKY	TBX21	LAIR2	CXCL13	IL17RA	TARP	KLRF1	GAGE2	SPON2	RRAD	CCL17	VASH1	EBI3		KCNH2	CXCL5	CTSG	CYP4F3
	TGFBR2	HLA-C	THEMIS2	IRF2		HKDC1		TNFRSF9		HLA-DOB	CD3G	ITM2A	USP9Y	VIL2	CTLA4	SMAD2	MYO7A	RORC	C1orf61	GNLY	ZNF747	KIR2DL3	XCL1	HSD11B1	F13A1	INDO		TKTL1	SCG5	TPSAB1	VNN3
	CXCL2	HLA-J	GLYR1	GBP4		GCK		ICOS		PNOC	CD28	FAM111A	PCNX	GDPD5	STAT4	CXCR6	CHGB		TRGV9	CTSW	XCL1	GZMB	PLA2G6	CCL13	CD1E	LAMP3		EMR1	SULT1C2	SLC18A2	FPRL1
	CCL14	HLA-DQB1	ICOS	GBP5		GPI		CD80		KIAA0125	LCK	PHF10	FOXP1	CCR2	CD38	GATA3	ICA1		CD160	KLRB1	XCL2	KIR3DS1	NIBP	CCL22	MMP12	OAS3		CCR3	MSR1	MS4A2	KCNJ15
	TGFBR3	HLA-DQB2	F5			PFKM		PDCD1LG2		CD19	TRAT1	NUP107	KLF12	MEFV	IL12RB2	IL26	HEY1		FEZ1	KLRK1	AF107846	KIR3DL1	FOXJ1	PPFIBP2	FABP4			ACACB	CTSK	CPA3	MME
	IL11RA	HLA-DQA2	TIGIT			PFKP		TIGIT		CR2	BCL11B	SEC24C	ST3GAL1	C7orf54	LTA		CDK5R1			NKG7	SLC30A5	FLJ20699	MADD	NPR1	CLEC10A			THBS1	PTGDS	TPSB2	IL8RA
	CCL11	HLA-DQA1	KLRD1			PFKL		CD70		IGHG1	CD2	NAP1L4	INPP4B	FLI1	CSF2		ST8SIA1			GZMH	NM_014114	TMEPAI	BG255923		SYT17			GALC	COLEC12	NM_003293	IL8RB
	IL4I1	HLA-A	IRF4			FBP1		TNFSF9		FCRL2	TRBC1	BATF	CASP8	TBC1D5			PDCD1			SIGIRR	MCM3AP	IL21R	MPPED1		MS4A6A			RNU2	GPC4	GATA2	FCGR3B
	IL33	HLA-DMA	PRKCQ			FBP2		ICOSLG		BLK	TRAC	ASF1A	MLL	DDX17			BLR1			ZBTB16	TBXA2R	KIR3DL3	MUC3B		CTNS			CLC	PCOLCE2	HDC	DYSF
	CXCL12	HLA-DOB	FCRL5			ALDOC		KIR3DL1		COCH	ITM2A	FRYL	PCM1	AKT3			KIAA1324			RUNX3	CDC5L	KIR2DS5			GUCA1A			HIST1H1C	CHIT1	LOH11CR2A	FCAR
	CXCL10	HLA-DRB1	SIRPG			ALDOA		CD86		OSBPL10	SH2D1A	FUSIP1	RP11-74E24.2	EWSR1			PVALB			APOL3	LOC730096	KIR2DS2			CARD9			CYSLTR2	KAL1	SIGLEC6	CEACAM3
	BMPER	HLA-B	LPXN			ALDOB		PDCD1		IGHA1	CD6	TRAC	PHC3	TBCD			TSHR			RORA	FUT5	GTF3C1			ABCG2			HRH4	CLEC5A	ELA2	HIST1H2BC
	BMP8A	HLA-DRB5	IL2RG			TPI1		LAIR1		TNFRSF17	CD96	RPA1	NFATC3	NFATC4			C18orf1			APBA2	FGF18	KIR2DS1			CD1A			RNASE2	ME1	CMA1	HPSE
	CXCL11	HLA-DOA	CCL5			GAPDH		TNFRSF8		ABCB4	NCALD	UBE2L3	LOC202134	LTK			TOX			WHDC1L1	MRC2	EDG8			PPARG			CAT	DNASE2B	PGDS	FLJ11151
	IL21R	HLA-DPB1	LCK			GAPDHS		TNFSF15		BLNK	GIMAP5	ANP32B	TIMM8A				SLC7A10			DUSP2	RP5-886K2.1				RAP1GAP			LRP5L	CCL7	MLPH	CREB5
	IL17B	HLA-DRA	TRAF3IP3			PGK2		TNFRSF14		GLDC	CD3E	DDX50	ATF7IP				SMAD1			GZMA	SPN				SLC7A8			SYNJ1	FN1	ADCYAP1	S100A12
	TNFRSF9	HLA-DRB6	CD86			PGK1		IDO2		MEF2C	SKAP1	C13orf34	REPS1				POMT1				PSMD4				GSTT1			THBS4	CD163	SLC24A3	TNFRSF10C
	ILF2	HLA-F	MAL			PGAM1		CD276		IGHM		PPP2R5C	PSPC1				PASK				PRX				NM_021941			GPR44	GM2A	CALB2	SLC22A4
	CX3CR1	HLA-G	LILRB1			PGAM2		CD40		FAM30A		SLC25A12	RPP38				MKL2				FZR1				FZD2			KBTBD11	SCARB2	KIT	KIAA0329
	CCR8	HLA-DMB	DOK2			PGAM4		TNFRSF4		SPIB		ATF2	HNRPH1				PTPN13				ZNF205				CSF1R			HES1	BCAT1	TAL1	SLC25A37
	TNFSF12	HLA-DPA1	CD6			ENO3		TNFSF14		BCL11A		CD28	STX16				KCNK5				AL080130				HS3ST2			ABHD2	RAI14	ABCC4	BST1
	CSF3		PAG1			ENO2		HHLA2		GNG7		GOLGA8A	CYLD				ZNF764				ZNF528				CH25H			TIPARP	COL8A2	PPM1H	CRISPLD2
	TNFSF4		LAX1			ENO1		CD244		IGKC			SNRPN				MAF				MAPRE3				LMAN2L			SMPD3	APOE	MAOB	G0S2
	BMP3		PLEK			ENO4		CD274		CD72			TRAF3IP3				MYO6				BCL2				SLC26A6			MYO15B	CHI3L1	HPGD	SIGLEC5
	CX3CL1		PIK3CD			PKM		HAVCR2		MICAL3			NEFL				SIRPG				NM_017616				BLVRB			TGIF1	ATG7	SCG2	CD93
	BMP5		SLAMF1			PKLR		CD27		BACH2			POLR2J2				THADA				ARL6IP2				NUDT9			RRP12	CD84	PTGS1	MGAM
	CXCR2		XCL1			PDHA2		BTLA		IGLC6			AQP3				MAGEH1				PDLIM4				PREP			IGSF2	FDX1	CEACAM8	ALPL
	TNFRSF10D		GPR171			PDHA1		LGALS9		CCR9			CG030				B3GAT1				NM_014274				TM7SF4			RCOR3	MS4A4A	MPO	FPR1
	BMP2		XCL2			PDHB		TMIGD2		QRSL1			PDXDC2				SH3TC1				LDB3				TACSTD2			EPN2	SGMS1	NR0B1	PDE4B
	CXCL14		TBX21			DLAT		CD28		DTNB			CLUAP1				HIST1H4K				ADARB1				CD1C			C9orf156	EMP1	LOC339524	LILRB2
	CCL28		CD2			DLD		CD48		HLA-DQA1			DOCK9				STK39				SMEK1							SIAH1	CYBB
	CXCL3		CD53			LDHAL6A		TNFRSF25		SCN3A			CYorf15B								TCTN2								CD68
	BMP6		KLHL6			LDHAL6B		CD40LG		SLC15A2			CREBZF								TINAGL1
	CCL21		SLAMF6			LDHA		ADORA2A					CEP68								IGFBP5
	CXCL9		CD40			LDHB		VTCN1					TXK								ALDH1B1
	CCL23		SIT1			LDHC		CD160					SLC7A6								NCR1
	IL6		TNFRSF4			ADH1A		CD44					FYB
	TNFRSF18		CD79A			ADH1B		TNFSF18					MAP3K1
	IL17RD		CD247			ADH1C		TNFRSF18
	IL17D		LCP2			ADH7		BTNL2
	IL27		CD3D			ADH4		C10orf54
	CCL7		CD27			ADH5		CD200R1
	IL1R1		SH2D1A			ADH6		TNFSF4
	CXCR4		FYB			AKR1A1		CD200
	CXCR2P1		ARHGAP30			ALDH2		NRP1
	TGFB1I1		ACAP1			ALDH3A2
	IFNGR1		CST7			ALDH1B1
	IL9R		CD3G			ALDH7A1
	IL1RAPL1		IL2RB			ALDH9A1
	IL11		CD3E			ALDH3B1
	CSF1		FCRL3			ALDH3B2
	IL20RA		CORO1A			ALDH1A3
	IL25		ITK			ALDH3A1
	TNFRSF4		TCL1A			ACSS1
	IL18		CYBB			ACSS2
	ILF3		CSF2RB			GALM
	CCL20		IKZF1			PGM1
	TNFRSF12A		NCF4			PGM2
	IL6ST		DOCK2			G6PC
	CXCL13		CCR2			G6PC2
	IL12B		PTPRC			G6PC3
	TNFRSF8		PLAC8			ADPGK
	IL6R		NCKAP1L			BPGM
	BMPR2		IL7R			MINPP1
	IFNE		2019-09-06			PCK1
	IL1RAPL2		CD28			PCK2
	IL3RA		STAT4
	BMP4		CD8A
	CCL24		LY9
	TNFSF13B		CD48
	CCR4		HCST
	IL2RA		PTPRCAP
	IL32		SASH3
	TNFRSF10C		ARHGAP25
	IL22RA1		LAT
	BMPR1A		TRAT1
	CXCR5		IL10RA
	CXCR3		PAX5
	IFNA8		CCR7
	IL17REL		DOCK11
	IFNB1		PARVG
	IFNAR1		SPNS1
	TNFRSF1B		CD52
	CCL17		HCLS1
	IFNL1		ARHGAP9
	IL16		GIMAP6
	IL1RL1		PRKCB
	ILK		MS4A1
	CCL25		GPR18
	ILDR2		TBC1D10C
	CXCR1		GVINP1
	IL36RN		P2RY8
	IL34		EVI2B
	TGFB1		VAMP5
	IFNG		KLRK1
	IL19		SELL
	ILKAP		MPEG1
	BMP2K		MS4A6A
	CCR10		ARHGAP15
	ILDR1		MFNG
	EPO		GZMK
	CCR7		SELPLG
	IL17C		TARP
	IL23A		GIMAP7
	CCR5		FAM65B
	IL7		INPP5D
	EPOR		ITGA4
	CCL13		MZB1
	IL2RG		GPSM3
	IL31RA		STK10
	TNFAIP6		CLEC2D
	IFNL2		IL16
	BMP1		NLRC3
	IL12RB1		GIMAP5
	TNFAIP8		GIMAP4
	IL4R		IFFO1
	TNFRSF6B		CFH
	TNFAIP8L1		PVRIG
	TNFRSF10B		CFHR1
	IFNL3
	CCL5
	CXCL6
	CXCL1
	CCR3
	TNFSF11
	CSF1R
	IL21
	IL1RAP
	IL12RB2
	CCL1
	IL17RA
	CCR1
	IL1RN
	TNFRSF11B
	TNFRSF14
	IL13
	IL2RB
	BMP8B
	CCL2
	IL24
	IL18RAP
	TGFBI
	TNFSF10
	TNFRSF11A
	CXCL5
	IL5RA
	TNFSF9
	IL1RL2
	TNFRSF13C
	IL36G
	IL15RA
	TNFRSF21
	CXCL8
	IL22RA2
	TNFAIP8L2
	IL18R1
	IFNLR1
	CXCR6
	CCL3L3
	TNFRSF1A
	IL17RE
	IFNGR2
	IL17RC
	TNFAIP8L3
	ILVBL
	TGFBRAP1
	CCL4L1
	CSF2RA
	CCRN4L
	CCL26
	TNFAIP1
	CCRL2
	IFNA10
	TNFRSF17
	IFNA13
	IL20
	IL18BP
	CCL3L1
	TNFSF12-TNFSF13
	IL5
	IL23R
	IL26
	TNF
	TGFA
	CSF2
	IL1F10
	CXCL17
	TNFSF13
	IFNA4
	IL37
	IL12A
	IL7R
	IFNA1
	IL1A
	IL4
	IL2
	CCL22
	CSF3R
	IL10
	IFNK
	TGFB2
	IL1R2
	IL1B
	IL17F
	IL27RA
	IL15
	TNFSF8
	IL36B
	XCL1
	CXCL16
	TNFRSF19
	IL3
	CCL3
	IFNA2
	BMPR1B
	IFNA21
	TNFSF18
	CCL8
	IL17RB
	TNFRSF25
	IL22
	IL10RB
	IFNAR2
	CCL18
	IFNA16
	CSF2RB
	IL36A
	TNFAIP3
	IL13RA2
	IL13RA1
	CCR9
	TNFRSF10A
	IFNA7
	IFNW1
	XCL2
	TNFSF14
	CCR2
	BMP15
	BMP10
	CCL15-CCL14
	TGFBR1
	IFNA5
	BMP7
	IFNA14
	IL20RB
	IL10RA
	IFNA17
	CCR6
	TGFB3
	CCL15
	CCL4
	CCL27
	TNFRSF13B
	TNFAIP2
	IL31
	IL17A
	TNFSF15
	CCL19
	IFNA6
	IL9
